# Supplementary material
Source: PubMed Central journal article supplement (PMC9396470)

## Supplemental Online Content

Rao S, Lee GM, Razzaghi H, et al. Clinical features and burden of postacute sequelae of SARS-CoV-2 infection in children and adolescents. *JAMA Pediatr*. Published online August 15, 2022. doi:10.1001/jamapediatrics.2022.2800

**eTable.** Code Sets for Systemic and Syndromic Features of PASC and Medication Therapeutic Classes Associated With PASC

**eFigure 1.** Medication Therapeutic Classes Associated With PASC

**eFigure 2.** Kaplan-Meier Plot for Risk of Any Syndromic Feature of PASC

**eFigure 3.** Kaplan-Meier Plot for Risk of Any Systemic Feature of PASC

**eFigure 4.** Kaplan-Meier Plot for Risk of Any Medication Feature of PASC

**eFigure 5.** Kaplan-Meier Plot for Risk of Any Syndromic, Systemic, or Medication Feature of PASC

This supplementary material has been provided by the authors to give readers additional information about their work.

**eTable.** Code Sets for Systemic and Syndromic Features of PASC and Medication Therapeutic Classes Associated With PASC

|                                                                                                                     | <b>Syndromic (symptoms, signs, non-specific laboratory abnormalities)</b>                                                                                                                                                                                                                                                                                                                                                                                                                                                                                     | <b>Systemic (diagnosed health conditions)</b>                                                                                                                                                                                                                                                                                                                                                                                                                                                                                                                                                                                                                                                                        | <b>Medication Therapeutic Classes</b>                                                                                                                                                                                                                                                                                                                                                                                                                                                                                                                                                                   |
|---------------------------------------------------------------------------------------------------------------------|---------------------------------------------------------------------------------------------------------------------------------------------------------------------------------------------------------------------------------------------------------------------------------------------------------------------------------------------------------------------------------------------------------------------------------------------------------------------------------------------------------------------------------------------------------------|----------------------------------------------------------------------------------------------------------------------------------------------------------------------------------------------------------------------------------------------------------------------------------------------------------------------------------------------------------------------------------------------------------------------------------------------------------------------------------------------------------------------------------------------------------------------------------------------------------------------------------------------------------------------------------------------------------------------|---------------------------------------------------------------------------------------------------------------------------------------------------------------------------------------------------------------------------------------------------------------------------------------------------------------------------------------------------------------------------------------------------------------------------------------------------------------------------------------------------------------------------------------------------------------------------------------------------------|
| Clinically predicted and empirically supported (i.e., lower limit of the 95% CI for the outcome was greater than 1) | <ul style="list-style-type: none"> <li>• Other changes in smell/taste</li> <li>• Loss of smell</li> <li>• Hair loss</li> <li>• Chest pain</li> <li>• Abnormal liver enzymes</li> <li>• Generalized pain</li> <li>• Anxiety symptoms</li> <li>• Skin rashes</li> <li>• Fever/chills</li> <li>• Cardiorespiratory signs/symptoms</li> <li>• Fatigue/malaise</li> <li>• Diarrhea</li> <li>• Allergies</li> <li>• Skin signs/symptoms</li> <li>• Nausea and vomiting</li> <li>• General signs and symptoms</li> <li>• Genitourinary signs and symptoms</li> </ul> | <ul style="list-style-type: none"> <li>• COVID-19</li> <li>• Multisystem inflammatory syndrome</li> <li>• PASC</li> <li>• Acute respiratory distress syndrome</li> <li>• Myocarditis</li> <li>• Myositis</li> <li>• Mental health treatment</li> <li>• Fluid/electrolyte disturbance</li> <li>• Disorders of teeth/gingiva</li> <li>• Other/ill-defined heart disease</li> <li>• Acute kidney injury</li> <li>• Thrombophlebitis and thromboembolism</li> <li>• Pneumonia</li> <li>• Bronchiolitis</li> <li>• Tonsillitis</li> <li>• Other/specified inflammatory condition of skin</li> <li>• Obesity</li> <li>• Communication/motor disorders</li> <li>• Respiratory failure</li> <li>• Gastroenteritis</li> </ul> | <ul style="list-style-type: none"> <li>• Antiarrhythmics, Class I and III</li> <li>• Antiemetics/antinauseants</li> <li>• Antiinflammatory and antirheumatic agents in combination</li> <li>• Cough and cold preparations</li> <li>• Systemic corticosteroids</li> <li>• Corticosteroids with antiseptics</li> <li>• Decongestants</li> <li>• Direct acting antivirals</li> <li>• Hypnotics/sedatives</li> <li>• Opioids</li> <li>• Parasympathomimetics</li> <li>• Propulsives</li> <li>• Cough suppressants and expectorants, combinations</li> <li>• Nasal decongestants for systemic use</li> </ul> |
| Clinically predicted but not empirically supported                                                                  | <ul style="list-style-type: none"> <li>• Abdominal pain</li> <li>• Abdominal signs and symptoms</li> <li>• Anger and aggression</li> <li>• Anorexia</li> <li>• Anxiety disorder</li> <li>• Arthralgia</li> <li>• Attention symptoms</li> <li>• Balance problems</li> </ul>                                                                                                                                                                                                                                                                                    | <ul style="list-style-type: none"> <li>• Academic developmental disorder</li> <li>• Addison disease</li> <li>• Alopecia areata</li> <li>• Antiphospholipid syndrome</li> <li>• Aplastic anemia</li> <li>• Appendicitis</li> <li>• Arrhythmias</li> <li>• Arthritis</li> <li>• Asthma</li> <li>• Attention deficit hyperactivity disorder</li> </ul>                                                                                                                                                                                                                                                                                                                                                                  | <ul style="list-style-type: none"> <li>• ACE Inhibitors, plain</li> <li>• Adrenergics, inhalants</li> <li>• Antidepressants</li> <li>• Antiepileptics</li> <li>• Antihistamines for systemic use</li> <li>• Antiinflammatory agents</li> <li>• Antimigraine preparations</li> <li>• Antithrombotic agents</li> <li>• Beta blocking agents</li> <li>• Drugs for peptic ulcer and gastro-oesophageal reflux disease (GORD)</li> </ul>                                                                                                                                                                     |

|  |                                                                                                                                                                                                                                                                                                                                                                                                                                                                                                                                                                                                                                                                                                                                                                                                                                                                                          |                                                                                                                                                                                                                                                                                                                                                                                                                                                                                                                                                                                                                                                                                                                                                                                                                                                                                                                                                                                                                                                                                                                                                                                                                                                                                                                |                                                                                                                                                                                                                                                                              |
|--|------------------------------------------------------------------------------------------------------------------------------------------------------------------------------------------------------------------------------------------------------------------------------------------------------------------------------------------------------------------------------------------------------------------------------------------------------------------------------------------------------------------------------------------------------------------------------------------------------------------------------------------------------------------------------------------------------------------------------------------------------------------------------------------------------------------------------------------------------------------------------------------|----------------------------------------------------------------------------------------------------------------------------------------------------------------------------------------------------------------------------------------------------------------------------------------------------------------------------------------------------------------------------------------------------------------------------------------------------------------------------------------------------------------------------------------------------------------------------------------------------------------------------------------------------------------------------------------------------------------------------------------------------------------------------------------------------------------------------------------------------------------------------------------------------------------------------------------------------------------------------------------------------------------------------------------------------------------------------------------------------------------------------------------------------------------------------------------------------------------------------------------------------------------------------------------------------------------|------------------------------------------------------------------------------------------------------------------------------------------------------------------------------------------------------------------------------------------------------------------------------|
|  | <ul style="list-style-type: none"> <li>• Bruising and bleeding disorders</li> <li>• Chilblain</li> <li>• Cognitive impairment</li> <li>• Cognitive signs and symptoms</li> <li>• Coma</li> <li>• Constipation</li> <li>• Cough</li> <li>• Delirium</li> <li>• Depressive symptoms</li> <li>• Diseases of the vocal cords and larynx</li> <li>• Dizziness and syncope</li> <li>• Dysphagia</li> <li>• Emotional and behavioral signs and symptoms</li> <li>• Genitourinary signs and symptoms</li> <li>• Headache</li> <li>• Loss of taste</li> <li>• Myalgia</li> <li>• Nasal congestion</li> <li>• Neuralgia and neuritis</li> <li>• Ocular pain</li> <li>• Otagia</li> <li>• Pruritis</li> <li>• Psychological symptoms, other</li> <li>• Sleep-wake disorders</li> <li>• Speech signs and symptoms</li> <li>• Stress</li> <li>• Visual disturbances</li> <li>• Weight loss</li> </ul> | <ul style="list-style-type: none"> <li>• Autism spectrum disorder</li> <li>• Autoimmune thyroiditis</li> <li>• Avoidant and restrictive food intake</li> <li>• Bipolar disorder</li> <li>• Bronchitis</li> <li>• Cardiomyopathy</li> <li>• Catatonia</li> <li>• Celiac disease</li> <li>• Chronic kidney disease</li> <li>• Chronic obstructive pulmonary disease and bronchiectasis</li> <li>• Conduct disorder</li> <li>• Dermatitis herpetiformis</li> <li>• Developmental delay</li> <li>• Diabetes mellitus</li> <li>• Diabetes mellitus, type 1</li> <li>• Diabetes mellitus, type 2</li> <li>• Dysautonomia</li> <li>• Encopresis</li> <li>• Feeding and eating disorders</li> <li>• Heart disease, other</li> <li>• Hypertension</li> <li>• Hypothyroidism</li> <li>• Idiopathic thrombocytopenic purpura</li> <li>• Inflammatory polyneuropathy</li> <li>• Intellectual disability</li> <li>• Kawasaki disease</li> <li>• Major depression</li> <li>• Minor depression</li> <li>• Neonatal digestive and feeding disorders</li> <li>• Oppositional defiant disorder</li> <li>• Pericarditis</li> <li>• Psoriasis</li> <li>• Psychotic disorder</li> <li>• Pulmonary fibrosis</li> <li>• Rhabdomyolysis</li> <li>• Schizoaffective disorder</li> <li>• Schizophrenia</li> <li>• Scleroderma</li> </ul> | <ul style="list-style-type: none"> <li>• Immunoglobulins</li> <li>• Immunosuppressants</li> <li>• Other drugs for obstructive airway diseases, inhalants</li> <li>• Expectorants, excl. combinations with cough suppressants</li> <li>• Other mineral supplements</li> </ul> |
|--|------------------------------------------------------------------------------------------------------------------------------------------------------------------------------------------------------------------------------------------------------------------------------------------------------------------------------------------------------------------------------------------------------------------------------------------------------------------------------------------------------------------------------------------------------------------------------------------------------------------------------------------------------------------------------------------------------------------------------------------------------------------------------------------------------------------------------------------------------------------------------------------|----------------------------------------------------------------------------------------------------------------------------------------------------------------------------------------------------------------------------------------------------------------------------------------------------------------------------------------------------------------------------------------------------------------------------------------------------------------------------------------------------------------------------------------------------------------------------------------------------------------------------------------------------------------------------------------------------------------------------------------------------------------------------------------------------------------------------------------------------------------------------------------------------------------------------------------------------------------------------------------------------------------------------------------------------------------------------------------------------------------------------------------------------------------------------------------------------------------------------------------------------------------------------------------------------------------|------------------------------------------------------------------------------------------------------------------------------------------------------------------------------------------------------------------------------------------------------------------------------|

|                                                                                         |                                                                                   |                                                                                                                                                                                                                                                                                                                                                                                                                                                                                                                                                                                                                                                                                                                                                                                                                                                                                                                                |                                                                                                                                                                                                                                                                                                                                                                                                                                                                                                                                                                                                                                                                                                                                                                                                                                                                                                                                                                                                                                                                                                                                                   |
|-----------------------------------------------------------------------------------------|-----------------------------------------------------------------------------------|--------------------------------------------------------------------------------------------------------------------------------------------------------------------------------------------------------------------------------------------------------------------------------------------------------------------------------------------------------------------------------------------------------------------------------------------------------------------------------------------------------------------------------------------------------------------------------------------------------------------------------------------------------------------------------------------------------------------------------------------------------------------------------------------------------------------------------------------------------------------------------------------------------------------------------|---------------------------------------------------------------------------------------------------------------------------------------------------------------------------------------------------------------------------------------------------------------------------------------------------------------------------------------------------------------------------------------------------------------------------------------------------------------------------------------------------------------------------------------------------------------------------------------------------------------------------------------------------------------------------------------------------------------------------------------------------------------------------------------------------------------------------------------------------------------------------------------------------------------------------------------------------------------------------------------------------------------------------------------------------------------------------------------------------------------------------------------------------|
|                                                                                         |                                                                                   | <ul style="list-style-type: none"> <li>• Seizures and epilepsy</li> <li>• Sexual dysfunction</li> <li>• Sjogren syndrome</li> <li>• Systemic lupus and other connective tissue disorders</li> <li>• Takotsubo cardiomyopathy</li> <li>• Temporal arteritis</li> <li>• Thyroiditis</li> <li>• Tic disorder</li> <li>• Vitiligo</li> </ul>                                                                                                                                                                                                                                                                                                                                                                                                                                                                                                                                                                                       |                                                                                                                                                                                                                                                                                                                                                                                                                                                                                                                                                                                                                                                                                                                                                                                                                                                                                                                                                                                                                                                                                                                                                   |
| Empirically supported but not clinically predicted or evaluated as clinically plausible | <ul style="list-style-type: none"> <li>• Superficial injury; contusion</li> </ul> | <ul style="list-style-type: none"> <li>• Breast cancer</li> <li>• Neurogenic/neuropathic arthropathy</li> <li>• Personal/family history of disease</li> <li>• Septicemia</li> <li>• Mental health treatment</li> <li>• Adverse effects of drugs and medicaments</li> <li>• Newborn status</li> <li>• Disorders of teeth and gingiva</li> <li>• Influenza</li> <li>• Other and ill-defined heart disease</li> <li>• Complication of device, implant, or graft</li> <li>• Contact dermatitis</li> <li>• Intestinal infection</li> <li>• Parasitic disease</li> <li>• Other injuries</li> <li>• Bacterial infections</li> <li>• Diseases of white blood cells</li> <li>• Tonsillitis</li> <li>• Coagulation and hemorrhagic disorders</li> <li>• Intestinal obstruction and ileus</li> <li>• Postprocedural or postoperative complications</li> <li>• Other specified encounters and counseling</li> <li>• Hypotension</li> </ul> | <ul style="list-style-type: none"> <li>• Ultrasound contrast media</li> <li>• Allergens</li> <li>• Irrigating solutions</li> <li>• Anesthetics, local</li> <li>• Ectoparasitocides, incl. scabicides</li> <li>• Anesthetics, general</li> <li>• Antiinflammatory/antirheumatic agents in combination</li> <li>• Antispasmodics in combination with analgesics</li> <li>• Corticosteroids, combinations with antibiotics</li> <li>• Antiinfectives and antiseptics, excl. combinations with corticosteroids</li> <li>• Bacterial vaccines</li> <li>• Vitamin k and other hemostatics</li> <li>• Other antibacterials</li> <li>• Antiinflammatory agents and antiinfectives in combination</li> <li>• Throat preparations</li> <li>• Bacterial and viral vaccines, combined</li> <li>• Corticosteroids, other combinations</li> <li>• Anti-acne preparations for topical use</li> <li>• Antifibrinolytics</li> <li>• Other otologicals</li> <li>• Antibiotics for topical use</li> <li>• Ascorbic acid (vitamin C), incl. combinations</li> <li>• Blood and related products</li> <li>• Medicated dressings</li> <li>• Local anesthetics</li> </ul> |

|                                                                                                                                                 |                                                                                                                                                        |                                                                                                                                                                                                                                                                                                                                                                                                                                                                                                                                                                                                                                                                                                   |                                                                                                                                                                                                                                                                                                                                                                                                                                                                                                                                                                                                                                                     |
|-------------------------------------------------------------------------------------------------------------------------------------------------|--------------------------------------------------------------------------------------------------------------------------------------------------------|---------------------------------------------------------------------------------------------------------------------------------------------------------------------------------------------------------------------------------------------------------------------------------------------------------------------------------------------------------------------------------------------------------------------------------------------------------------------------------------------------------------------------------------------------------------------------------------------------------------------------------------------------------------------------------------------------|-----------------------------------------------------------------------------------------------------------------------------------------------------------------------------------------------------------------------------------------------------------------------------------------------------------------------------------------------------------------------------------------------------------------------------------------------------------------------------------------------------------------------------------------------------------------------------------------------------------------------------------------------------|
|                                                                                                                                                 |                                                                                                                                                        | <ul style="list-style-type: none"> <li>• Other specified inflammatory condition of skin</li> <li>• Viral infection</li> <li>• Obesity</li> <li>• Pleurisy, pleural effusion and pulmonary collapse</li> <li>• Other specified status</li> <li>• Complication of other surgical or medical care injury</li> <li>• Other specified upper respiratory infections</li> <li>• Inflammatory conditions of male genital organs</li> <li>• Urinary tract infections</li> <li>• Other specified and unspecified skin disorders</li> <li>• Skin and subcutaneous tissue infections</li> <li>• Administrative encounter</li> <li>• Nervous system pain and pain syndromes</li> <li>• Otitis media</li> </ul> | <ul style="list-style-type: none"> <li>• All other therapeutic products</li> <li>• Vitamin B12 and folic acid</li> <li>• Viral vaccines</li> <li>• Antispasmodics in combination with psycholeptics</li> <li>• Muscle relaxants, peripherally acting agents</li> <li>• Antifungals for topical use</li> <li>• Antiseptics and disinfectants</li> <li>• Other ophthalmologicals</li> <li>• Corticosteroids and antiinfectives in combination</li> <li>• Drugs for functional gastrointestinal disorders</li> <li>• I.V. solution additives</li> <li>• Other beta-lactam antibacterials</li> <li>• Beta-lactam antibacterials, penicillins</li> </ul> |
| <p>Clinically predicted but outcome found to be of greater risk in test negative cohort (upper limit of 95% CI for outcome was less than 1)</p> | <ul style="list-style-type: none"> <li>• Balance problems</li> <li>• Stress</li> <li>• Cough</li> <li>• Chilblain</li> <li>• Abdominal pain</li> </ul> | <ul style="list-style-type: none"> <li>• Feeding and eating disorders</li> <li>• Seizures and epilepsy</li> <li>• Major depression</li> <li>• Minor depression</li> <li>• Celiac disease</li> <li>• Dysautonomia</li> <li>• Autism spectrum disorder</li> <li>• Intellectual disability</li> </ul>                                                                                                                                                                                                                                                                                                                                                                                                | <ul style="list-style-type: none"> <li>• ACE inhibitors, plain</li> <li>• Antidepressants</li> <li>• Antiepileptics</li> <li>• Antithrombotic agents</li> <li>• Beta blocking agents</li> <li>• Drugs for peptic ulcer and gastro-oesophageal reflux disease (GORD)</li> <li>• Immunosuppressants</li> </ul>                                                                                                                                                                                                                                                                                                                                        |

<sup>a</sup> Codesets were developed from ICD codes, the full list of the code assignments to clusters is publicly available at <https://github.com/PEDSnet/PASC>.

**eFigure 1.** Medication Therapeutic Classes Associated With PASC

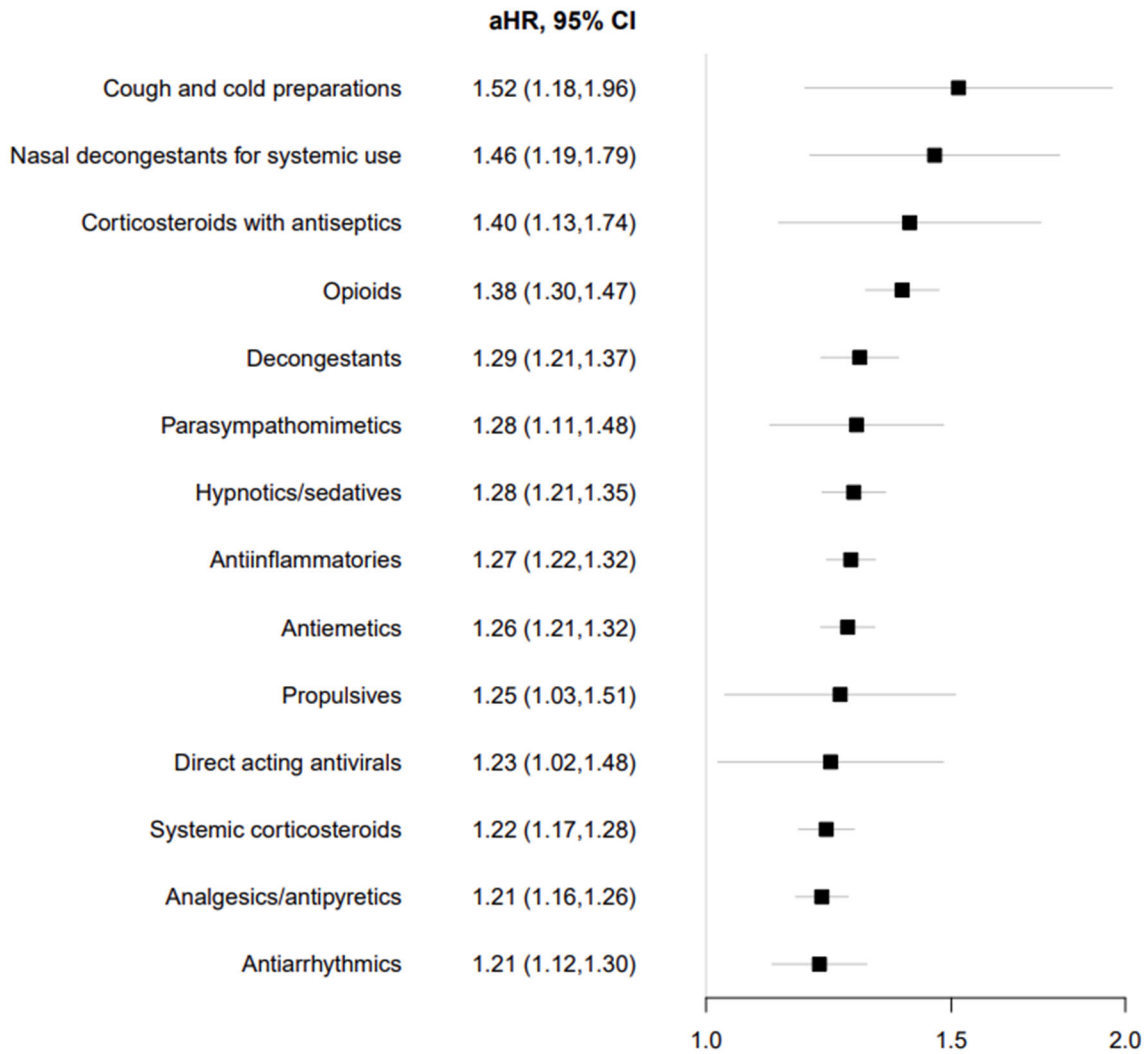

**eFigure 2.** Kaplan-Meier Plot for Risk of Any Syndromic Feature of PASC

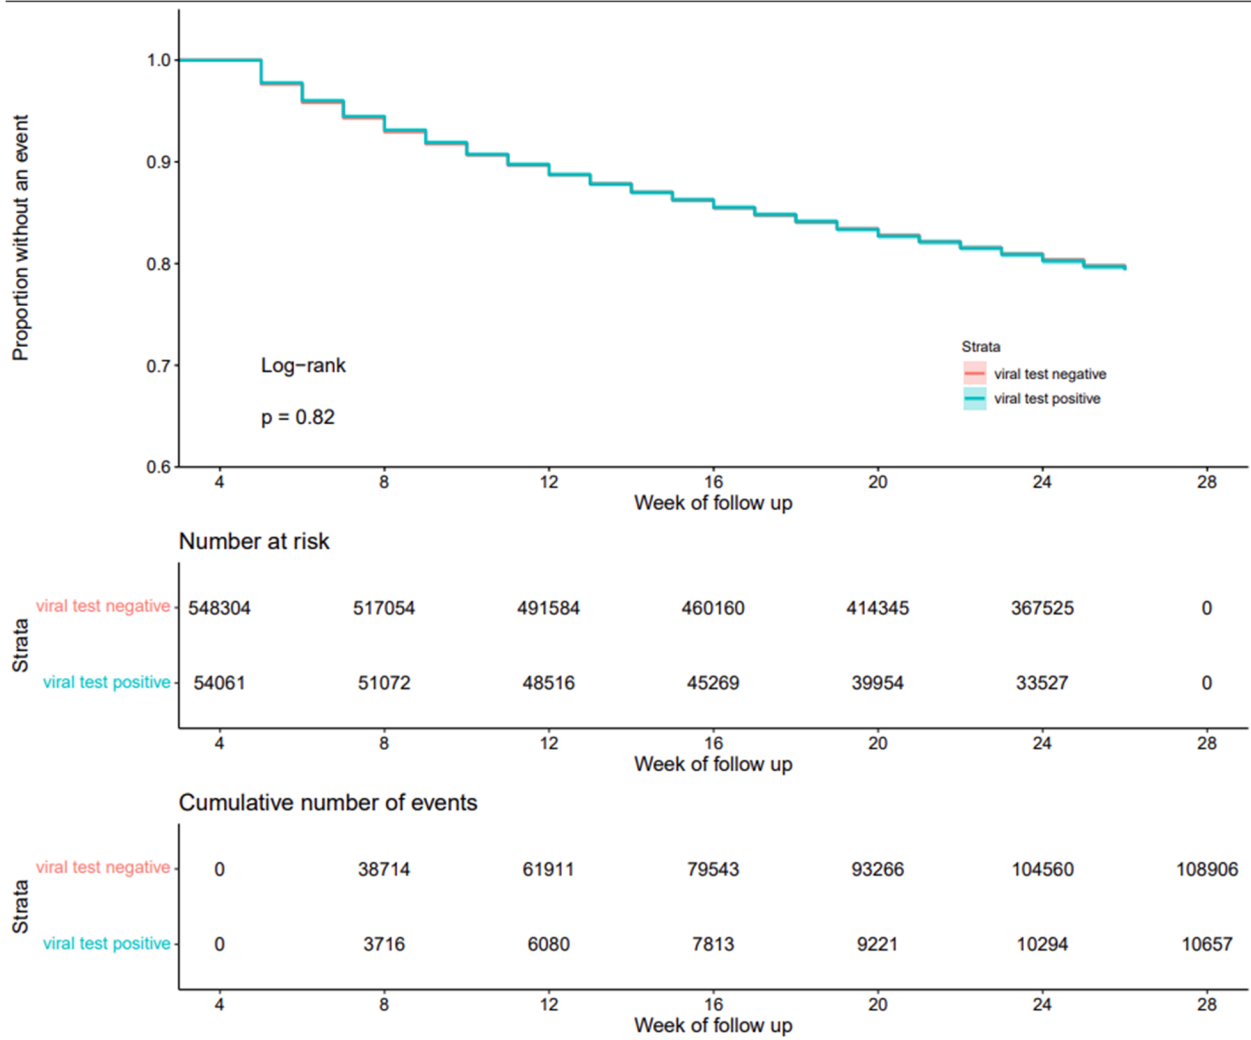

**eFigure 3.** Kaplan-Meier Plot for Risk of Any Systemic Feature of PASC

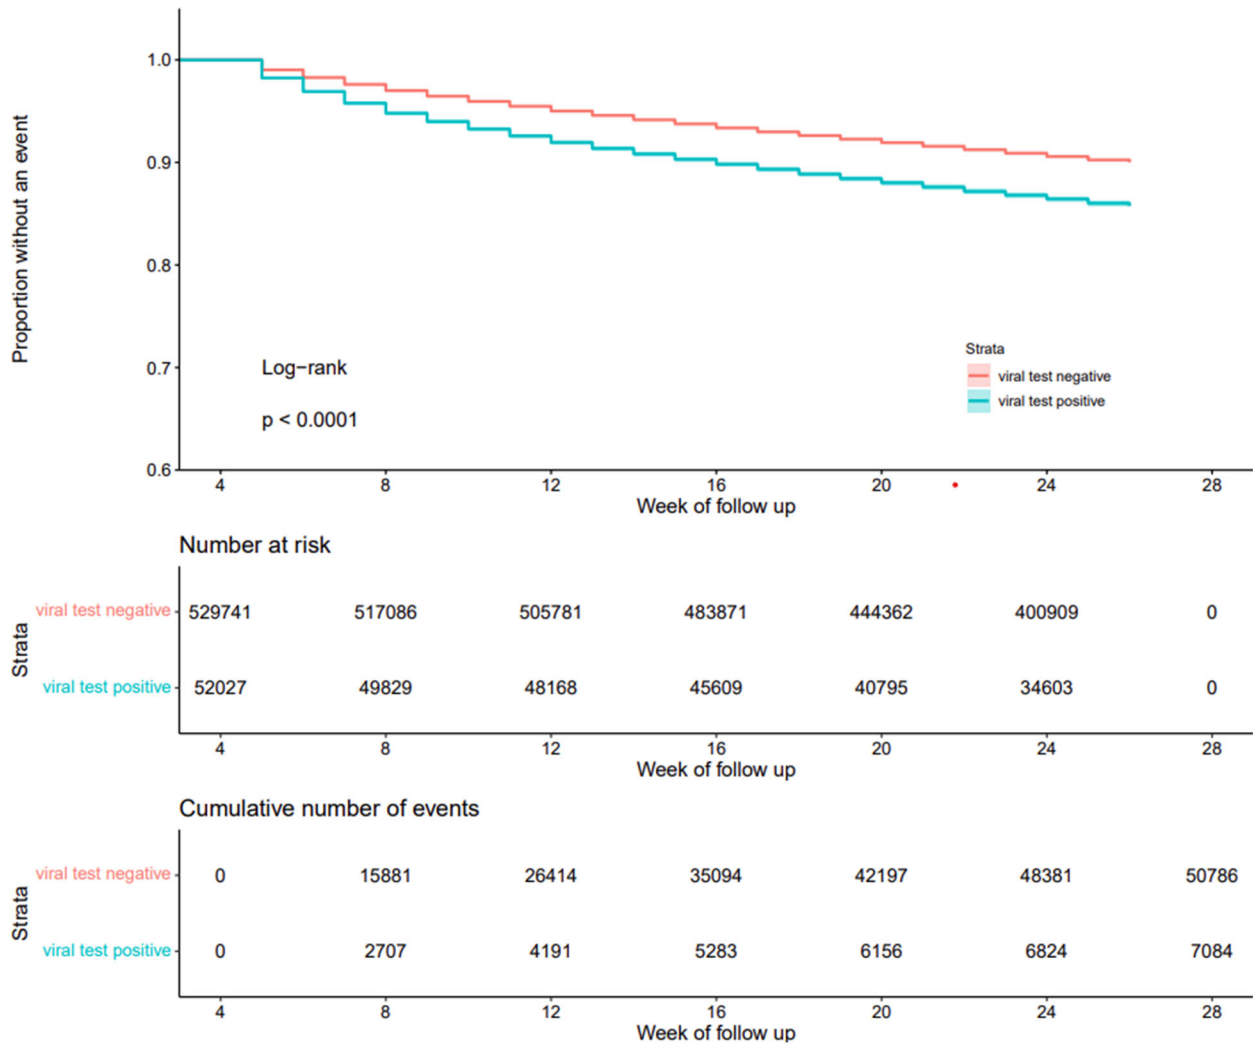



**eFigure 4.** Kaplan-Meier Plot for Risk of Any Medication Feature of PASC

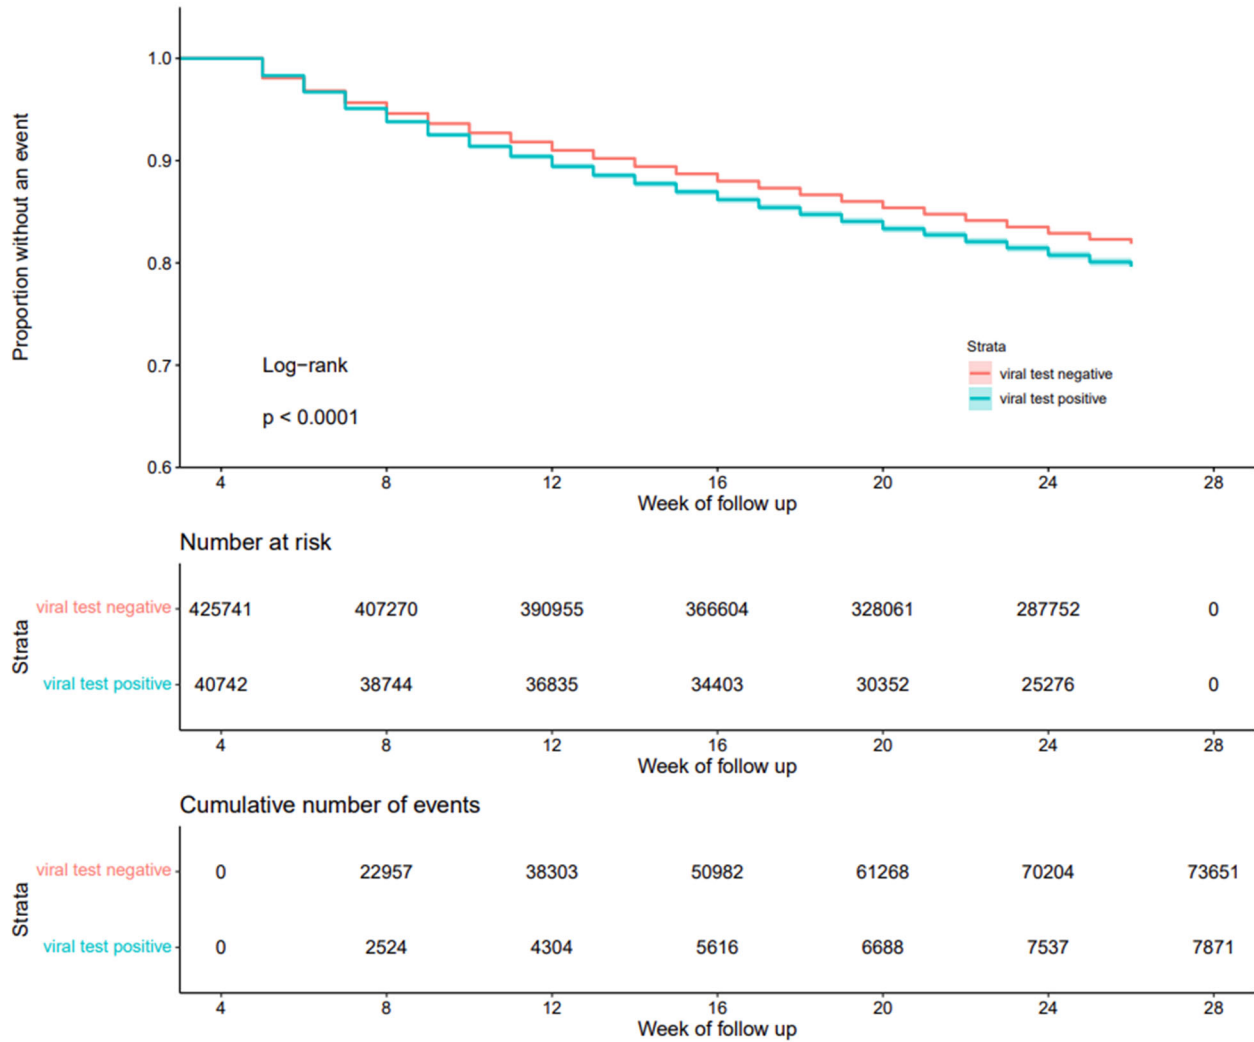

**eFigure 5.** Kaplan-Meier Plot for Risk of Any Syndromic, Systemic, or Medication Feature of PASC

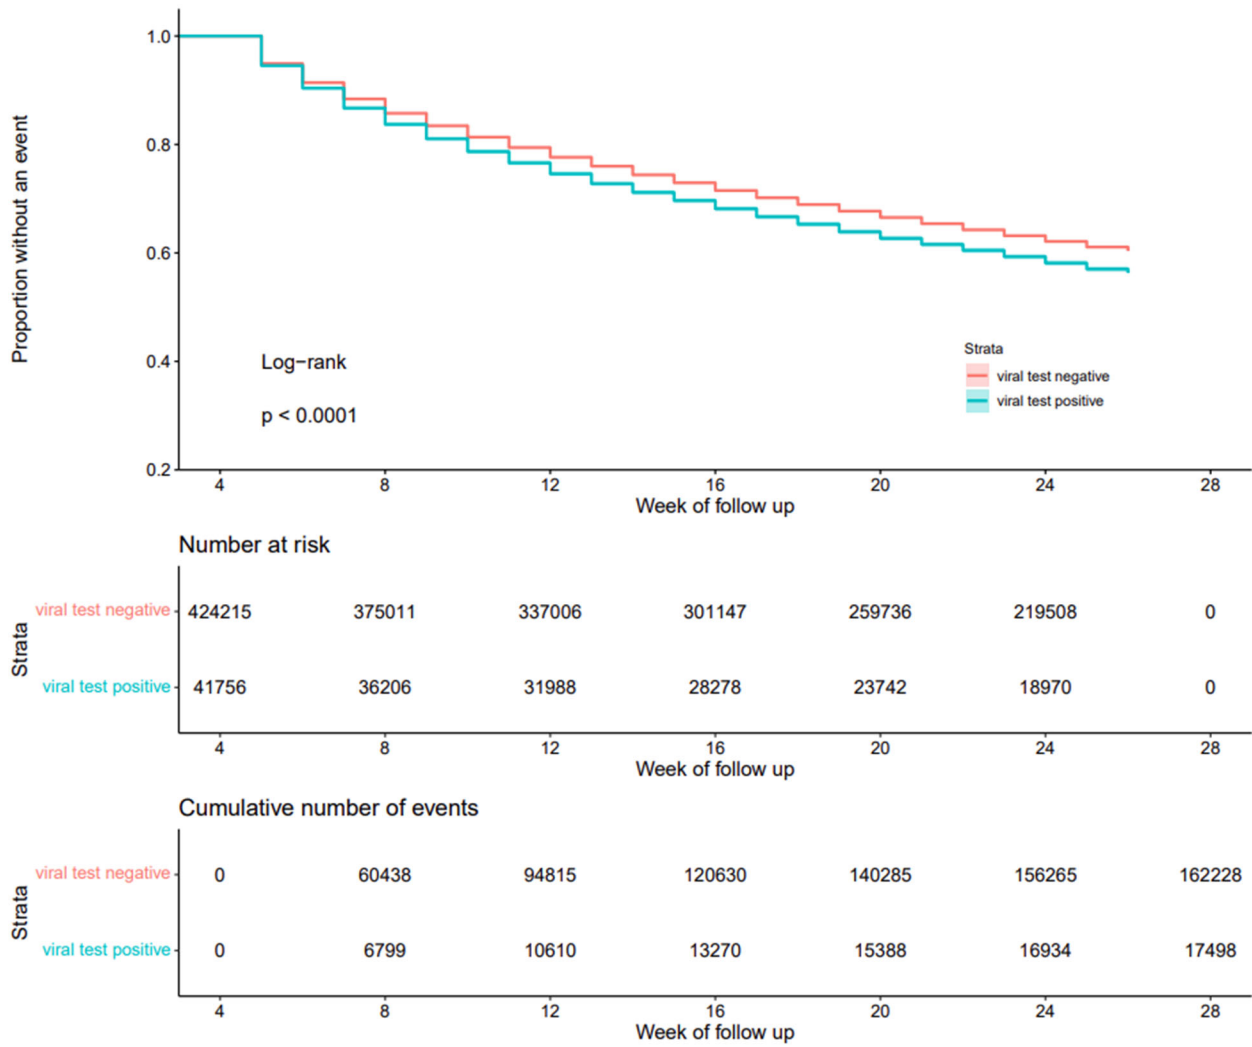

Supplement: jamapediatr-e222800-s001.pdf [file jamapediatr-e222800-s001.pdf]
